# Supplementary material for: Four chromosome scale genomes and a pan-genome annotation to accelerate pecan tree breeding
Source: PubMed Central journal article supplement (PMC8257795; doi:10.1038/s41467-021-24328-w), 2021-07-05
Supplement: 41467_2021_24328_MOESM1_ESM.pdf [file 41467_2021_24328_MOESM1_ESM.pdf]

**Four chromosome scale genomes and a pan-genome annotation to accelerate  
pecan tree breeding**

Lovell *et al.*

**A** Phenotypic differences among reference genotypes  
 'Pawnee' 'Lakota'

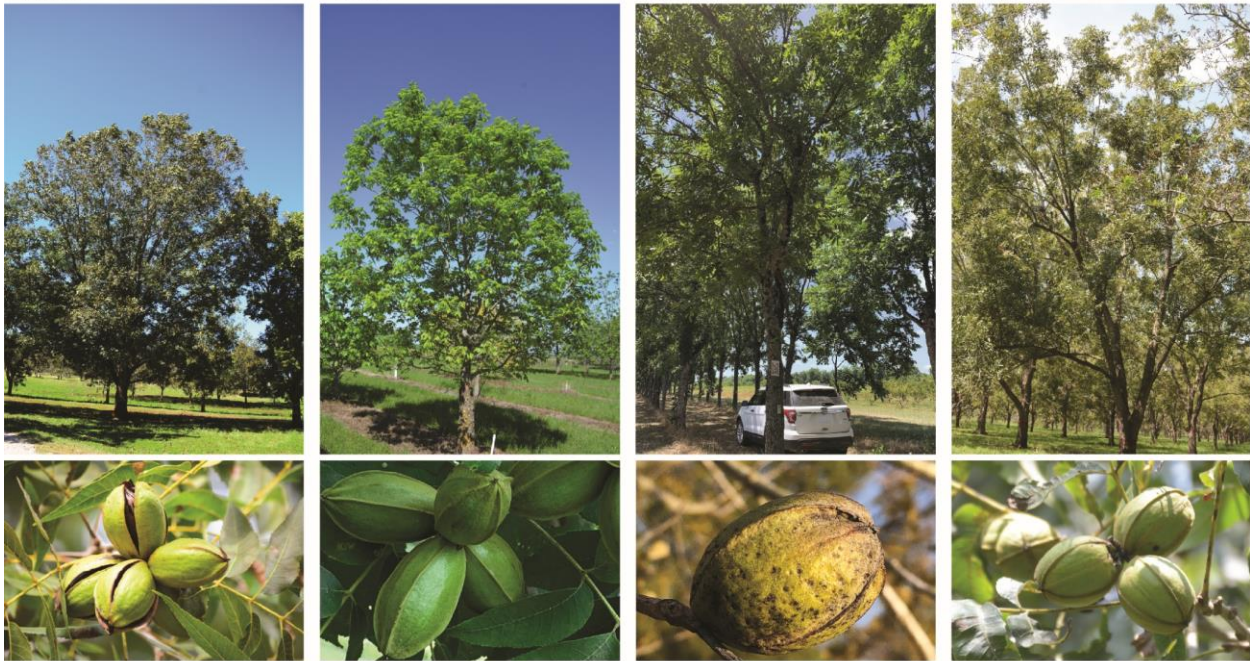

**B** Pecan genetic diversity

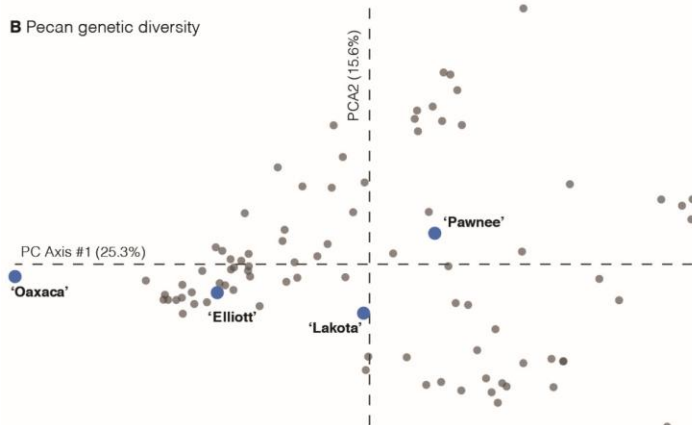

**Supplementary Figure 1. Morphology and genetic diversity of reference pecan genotypes.** **a**, Field photos of the trees and nut clusters taken just before maturity for the four reference genomes (plant locations): 'Pawnee' (Somerville, TX, USA, 26-October 2017), 'Lakota' (Somerville, TX, USA, 15-April 2016), 'Oaxaca' (Byron, GA, USA, 17-July 2019) and 'Elliott' (Somerville, TX, USA, 23-Sept 2017). **b**, Genetic diversity of a set of 108 pecan genotypes highlighting the four reference genotypes in principal component (PC Axis, PCA) space. Source data underlying Supplementary Figure 1b are provided as a Source Data file.

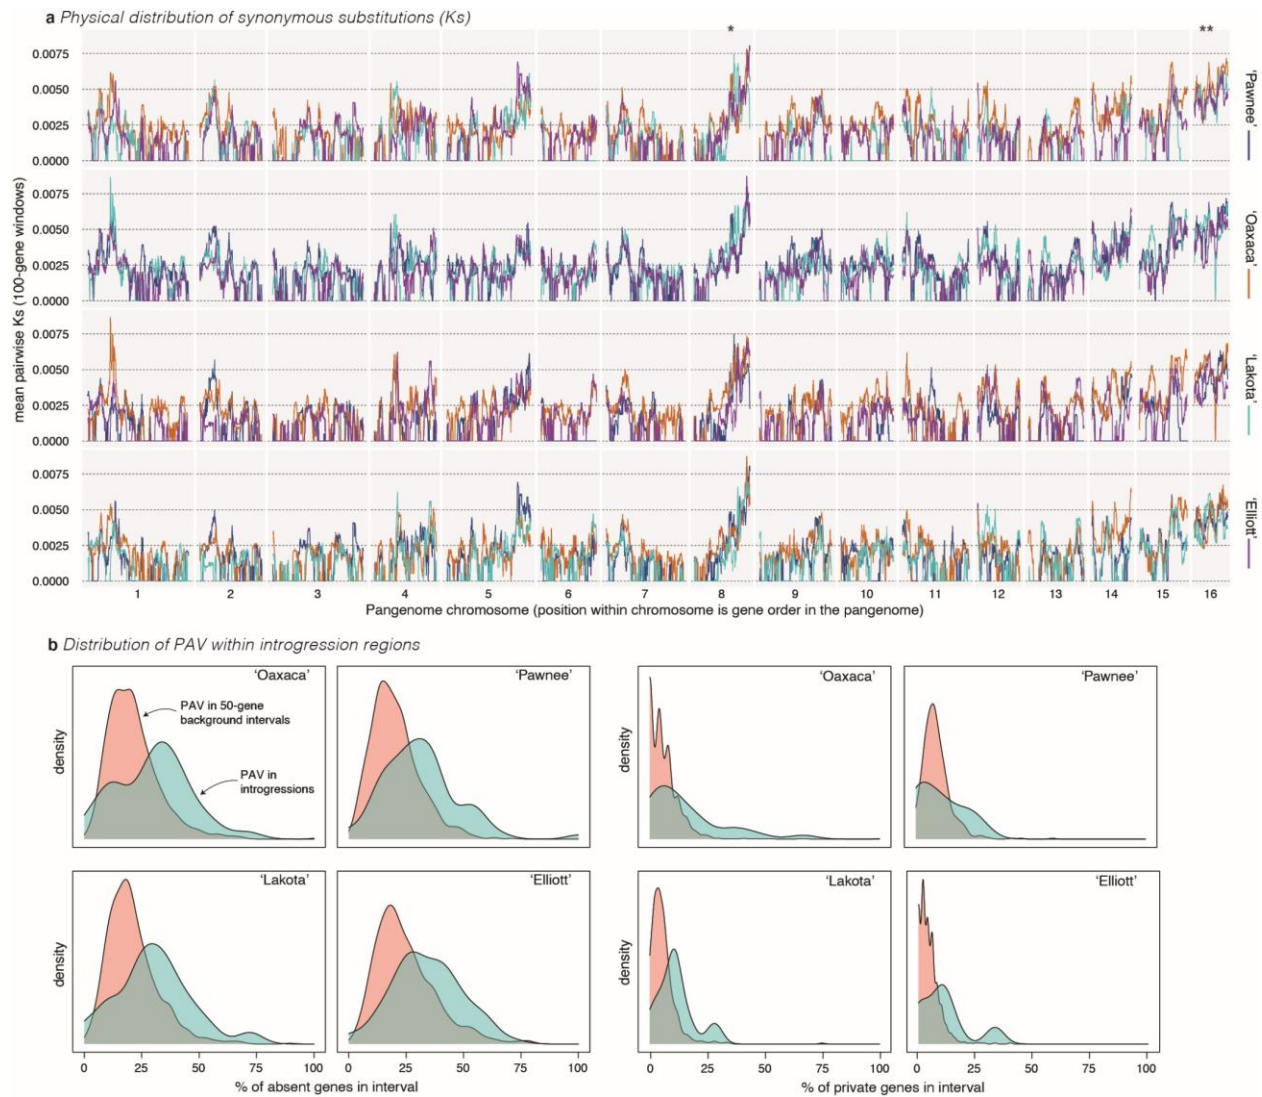

**Supplementary Figure 2. Coding and presence-absence variation across the genome and within introgressions. a,** Synonymous substitution rate ( $K_s$ ) was calculated for all 21,196 single copy orthogroups; mean  $K_s$  was calculated for each pairwise combination of genomes along 99-gene overlapping 100-gene intervals across the genome. Intervals marked in Fig. 2d are labeled with \*/\*\* here. **b,** Presence absence variation (PAV) within each genome was extracted from the pan-genome and binned into two groups that may be of significance for evolutionarily independent introgressions: gene models private to a single genome, or genes that were absent in a genome. Mean values were calculated for each of the introgression intervals (Fig. 2b) and all non-overlapping 50-gene intervals that do not include an introgression. Combined, the elevated values of private and absent genes in introgression regions validated the existence and genomic impact of introgressions across the genome. Source data are provided as a Source Data file.



**a** Differential expression to scab inoculation

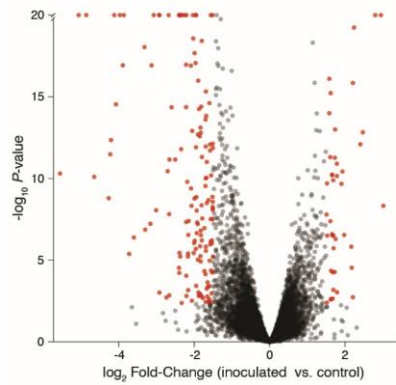

**b** Phenotypic confirmation of inoculation

| Treatment                      | plant ID | n. leaflets | Mean % hyphae* |
|--------------------------------|----------|-------------|----------------|
| diH <sub>2</sub> O (control)** | 5        | 5           | 0              |
| diH <sub>2</sub> O (control)** | 12       | 5           | 0              |
| diH <sub>2</sub> O (control)** | 19       | 5           | 0              |
| De-Tif-11                      | 61       | 3           | 30.2           |
| De-Tif-11                      | 47       | 5           | 64.2           |
| De-Tif-11                      | 54       | 5           | 72.8           |

\*Mean calculated across leaflets as the % of conidia with subcuticular hyphae.

\*\*No *V. effusa* conidia were observed on any of the control inoculation samples.

**c** Visualization of fungal colonization

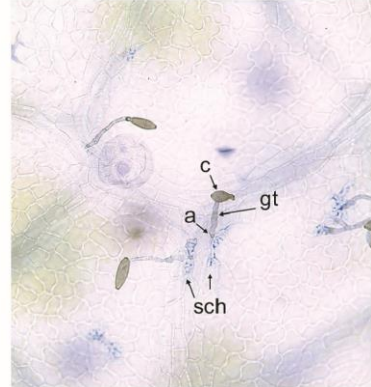

**Supplementary Figure 4. Expression and phenotypic response to fungal inoculation.** **a**, Differential expression between control (diH<sub>2</sub>O) and inoculated treatments of a virulent strain of *V. effusa* (De-Tif-11) in the 'Desirable' susceptible cultivar. Significantly differentially expressed genes are shaded in red; *P*-values < 1×10<sup>-20</sup> were thresholded to that value for visualization purposes. This experiment was conducted once at a single time point. **b**, Fungal infection was not observed in the control treatment, but was highly present in all samples of the inoculated treatment. **c**, light microscope image (400×) of fungal colonization: a = appressorium, c = conidium, gt = germ tube, sch = subcuticular hyphae. Raw data associated with Supplementary Figure 4a can be found in Supplementary Data 3.

**Supplementary Table 1. Library metadata for genome annotation RNA-sequencing experiments.**

| Lib* | Genome  | Sample             | nRaw**   | nPrep    | nAssign  | nNoFeat | nAmb   | nUnmap  | nMulti  | Bioproject*** | SRA BioID   |
|------|---------|--------------------|----------|----------|----------|---------|--------|---------|---------|---------------|-------------|
| IKDJ | Oaxaca  | Airlayerrroots_1   | 31595167 | 30689855 | 21889912 | 852409  | 160053 | 5960676 | 1826805 | PRJNA680537   | SRR13411590 |
| IKDP | Oaxaca  | Catkin_1           | 20354464 | 20007417 | 12592282 | 833045  | 121267 | 4812867 | 1647956 | PRJNA680537   | SRR13411591 |
| IKDU | Oaxaca  | Dormantbud_1       | 31991044 | 31176496 | 22129664 | 1651151 | 208992 | 6721732 | 464957  | PRJNA680537   | SRR13411592 |
| IKDZ | Oaxaca  | Expandingleaf_1    | 31293011 | 30591221 | 22597770 | 1302362 | 175107 | 5815366 | 700616  | PRJNA680537   | SRR13411593 |
| IKED | Oaxaca  | Pistillateflower_1 | 33951296 | 33227504 | 24247412 | 1569756 | 149489 | 5904165 | 1356682 | PRJNA680537   | SRR13411595 |
| IKEH | Oaxaca  | Swellingbud_1      | 38233085 | 37449807 | 27391719 | 1716584 | 198143 | 7363861 | 779500  | PRJNA680537   | SRR13411594 |
| IKDK | Elliott | Expandingleaf_1    | 36095993 | 35529055 | 24499427 | 1484888 | 275275 | 8545903 | 723562  | PRJNA680537   | SRR13413659 |
| IKDQ | Elliott | Swellingbud_3      | 30125676 | 29537741 | 20443418 | 1040238 | 258331 | 7201530 | 594224  | PRJNA680537   | SRR13413660 |
| IKDW | Elliott | Swellingbud_1      | 39335301 | 38475648 | 26598709 | 1537635 | 310354 | 9274259 | 754691  | PRJNA680537   | SRR13413661 |
| IKEL | Elliott | Dormantbud_1       | 33299467 | 32150326 | 23201642 | 1418233 | 179342 | 6805082 | 546027  | PRJNA680537   | SRR13413662 |
| IKEQ | Elliott | Expandingleaf_2    | 32900656 | 32389745 | 23718103 | 1175931 | 149191 | 6762986 | 583534  | PRJNA680537   | SRR13413663 |
| IKEU | Elliott | Swellingbud_2      | 34841228 | 34333563 | 24768532 | 1356877 | 181699 | 7399093 | 627362  | PRJNA680537   | SRR13413664 |
| IKEZ | Elliott | Dormantbud_2       | 37472079 | 36944722 | 26851345 | 1635879 | 181200 | 7644937 | 631361  | PRJNA680537   | SRR13413665 |
| IKFD | Elliott | Dormantbud_3       | 28023720 | 27690668 | 19942968 | 1246397 | 155960 | 5822356 | 522987  | PRJNA680537   | SRR13413666 |
| IKFH | Elliott | Expandingleaf_3    | 29565351 | 29194307 | 20334623 | 1285669 | 171462 | 6810776 | 591777  | PRJNA680537   | SRR13413667 |
| IKDL | Lakota  | Pistillateflower_1 | 30930962 | 30597206 | 21982479 | 1584763 | 256411 | 5272765 | 1500788 | PRJNA680537   | SRR13419224 |
| IKDR | Lakota  | Swellingbud_2      | 30064474 | 29762491 | 21457850 | 1204957 | 223317 | 5786197 | 1090170 | PRJNA680537   | SRR13419225 |
| IKEA | Lakota  | Catkin_1           | 27219338 | 26642794 | 18261603 | 1392318 | 192338 | 5454457 | 1342078 | PRJNA680537   | SRR13419226 |
| IKEE | Lakota  | Dormantbud_1       | 30212483 | 29635989 | 20160259 | 2551427 | 177993 | 5571169 | 1175141 | PRJNA680537   | SRR13419227 |
| IKEI | Lakota  | Expandingleaf_1    | 30561527 | 30103038 | 21704855 | 1401858 | 236179 | 5353619 | 1406527 | PRJNA680537   | SRR13419228 |
| IKEM | Lakota  | Swellingbud_1      | 35925521 | 35140806 | 25435288 | 1685272 | 267801 | 6301127 | 1451318 | PRJNA680537   | SRR13419229 |
| IKER | Lakota  | Dormantbud_2       | 34409339 | 33496364 | 21626690 | 2861065 | 203938 | 7760043 | 1044628 | PRJNA680537   | SRR13419230 |
| IKEW | Lakota  | Expandingleaf_2    | 39342484 | 38437170 | 26589948 | 1692836 | 354810 | 7337804 | 2461772 | PRJNA680537   | SRR13419231 |
| IKFA | Lakota  | Catkin_2           | 32895103 | 32228477 | 21443841 | 1330221 | 306615 | 6894455 | 2253345 | PRJNA680537   | SRR13419232 |
| IKFE | Lakota  | Dormantbud_3       | 32554576 | 31851515 | 20139740 | 3117318 | 187024 | 7493007 | 914426  | PRJNA680537   | SRR13419233 |
| IKFI | Lakota  | Expandingleaf_3    | 37099364 | 36493558 | 25987143 | 1547637 | 307361 | 6977060 | 1674357 | PRJNA680537   | SRR13419234 |
| IKDM | Pawnee  | Expandingleaf_1    | 33887643 | 33495687 | 23838304 | 2330946 | 206691 | 6547781 | 571965  | PRJNA680537   | SRR13422673 |
| IKDS | Pawnee  | Swellingbud_1      | 36211607 | 35727875 | 24536811 | 2539980 | 202845 | 7948268 | 499971  | PRJNA680537   | SRR13422674 |
| IKDX | Pawnee  | Catkin_1           | 33714954 | 33325730 | 21656548 | 2244771 | 194375 | 8780696 | 449340  | PRJNA680537   | SRR13422675 |
| IKEB | Pawnee  | Dormantbud_1       | 25551216 | 25229809 | 16470301 | 2635464 | 120689 | 5691040 | 312315  | PRJNA680537   | SRR13422676 |
| IKEF | Pawnee  | Expandingleaf_2    | 36618138 | 36193308 | 24117203 | 2360641 | 197522 | 8985885 | 532057  | PRJNA680537   | SRR13422677 |
| IKEJ | Pawnee  | Swellingbud_2      | 31280422 | 30895396 | 20606472 | 2170516 | 163865 | 7505136 | 449407  | PRJNA680537   | SRR13422678 |
| IKEN | Pawnee  | Catkin_2           | 36979548 | 36579904 | 24481535 | 2386465 | 140687 | 9152683 | 418534  | PRJNA680537   | SRR13422679 |
| IKES | Pawnee  | Dormantbud_2       | 37538543 | 37076220 | 24821739 | 4158913 | 146494 | 7503257 | 445817  | PRJNA680537   | SRR13422680 |
| IKEX | Pawnee  | Expandingleaf_3    | 30236521 | 29838951 | 20380895 | 1985092 | 138839 | 6909910 | 424215  | PRJNA680537   | SRR13422681 |
| IKFB | Pawnee  | Swellingbud_3      | 33297295 | 32928789 | 22964145 | 2095304 | 176357 | 7225488 | 467495  | PRJNA680537   | SRR13422682 |
| IKFF | Pawnee  | Catkin_3           | 37134916 | 36657478 | 24176703 | 2158420 | 259679 | 9383855 | 678821  | PRJNA680537   | SRR13422683 |
| IKFJ | Pawnee  | Dormantbud_3       | 37703282 | 37334858 | 24524021 | 4172036 | 147314 | 8006888 | 484599  | PRJNA680537   | SRR13422684 |

\*The first three metadata columns give the unique library ID, genome ID and the tissue type/replicate for each library.

\*\*The following seven counts columns provide the number of raw and prepped reads, and counts of gene-, no gene-, ambiguous-, un- and multi-mapping reads.

\*\*\*The rightmost two columns give the SRA bioproject IDs and identifiers for the libraries deposited on NCBI.

**Supplementary Table 2. Tabulation of types of PAV among genomes\*.**

| Sequence similarity** | Gene score confidence*** | Elliott | Lakota | Oaxaca | Pawnee |
|-----------------------|--------------------------|---------|--------|--------|--------|
| Absent                | High                     | 375     | 120    | 162    | 86     |
| Absent                | Low                      | 1964    | 1506   | 1492   | 1359   |
| Absent                | Moderate                 | 722     | 297    | 327    | 245    |
| Diverged              | High                     | 62      | 70     | 85     | 51     |
| Diverged              | Low                      | 755     | 730    | 845    | 774    |
| Diverged              | Moderate                 | 188     | 179    | 230    | 125    |
| Very Similar          | High                     | 452     | 452    | 533    | 350    |
| Very Similar          | Low                      | 3461    | 3264   | 3050   | 3456   |
| Very Similar          | Moderate                 | 1041    | 1015   | 105    | 911    |

\*Present genes in orthogroups with presence-absence variation (PAV) were mapped against genome assemblies that were missing orthologous gene models (absences).

\*\*The resulting alignments were categorized as 'very similar' (>99% sequence coverage, ≥95% sequence identity) 'diverged' (75-99% sequence coverage, 75-95% sequence identity) or 'absent' (0-75% sequence coverage or 0-75% sequence identity).

\*\*\*Gene scores (see methods) were binned into three equally sized quantiles based on the distribution of all gene models across all genes, regardless of PAV status. In this case, the three gene score confidence bins were defined as 'high' (>1012.256), 'moderate' (1012.256 - 177.664) and 'low' confidence (<166.664). The tabulation of these scores are not equal in the table below as bins were calculated on the total gene score distribution and low-score genes were highly enriched in PAV genes. The counts of each pairwise combination of gene score confidence and sequence similarity bins between present genes and un-annotated syntenic sequence are presented for each genome in their respective columns.

**Supplementary Table 3. Extent of large ( $\geq 500$ -SNP) introgressions into the four reference genomes.**

| Plant ID               | Aqu**        | Cor.        | Myr.       | Pecan         | A (%)       | C (%)       | M (%)       | P (%)        |
|------------------------|--------------|-------------|------------|---------------|-------------|-------------|-------------|--------------|
| <b>'Oaxaca**</b>       | <b>20.57</b> | <b>0.6</b>  | <b>0</b>   | <b>612.68</b> | <b>3.23</b> | <b>0.09</b> | <b>0</b>    | <b>96.21</b> |
| 87MX3-2.4              | 23.54        | 0.66        | 0.22       | 610.26        | 3.7         | 0.1         | 0.03        | 95.83        |
| 87MX4-5.5              | 21.6         | 1.25        | 0.41       | 610.99        | 3.39        | 0.2         | 0.06        | 95.95        |
| 87MX5-1.7              | 14.56        | 1.26        | 0          | 619.15        | 2.29        | 0.2         | 0           | 97.23        |
| <b>'Elliott'</b>       | <b>10.84</b> | <b>0</b>    | <b>2.7</b> | <b>620.66</b> | <b>1.7</b>  | <b>0</b>    | <b>0.42</b> | <b>97.46</b> |
| 'Curtis'               | 19.32        | 0           | 2.15       | 613.73        | 3.03        | 0           | 0.34        | 96.38        |
| 'Kanza'                | 18.57        | 7.71        | 0          | 606.76        | 2.92        | 1.21        | 0           | 95.28        |
| 'Kennedy'              | 14.25        | 0           | 0.9        | 620.68        | 2.24        | 0           | 0.14        | 97.47        |
| <b>'Lakota'</b>        | <b>18.38</b> | <b>1.41</b> | <b>0</b>   | <b>615.09</b> | <b>2.89</b> | <b>0.22</b> | <b>0</b>    | <b>96.59</b> |
| 'Major'                | 23.22        | 8.66        | 0          | 603.56        | 3.65        | 1.36        | 0           | 94.78        |
| 'Mohawk'               | 2.72         | 0           | 0.79       | 631.24        | 0.43        | 0           | 0.12        | 99.13        |
| 'Moore'                | 17.9         | 0           | 0.38       | 617.02        | 2.81        | 0           | 0.06        | 96.89        |
| 'Osage'                | 18.7         | 7.52        | 0          | 608.21        | 2.94        | 1.18        | 0           | 95.51        |
| <b>'Pawnee'</b>        | <b>6.63</b>  | <b>0</b>    | <b>0</b>   | <b>629.09</b> | <b>1.04</b> | <b>0</b>    | <b>0</b>    | <b>98.79</b> |
| 'Randall'              | 11.18        | 0           | 0          | 624.38        | 1.76        | 0           | 0           | 98.05        |
| 'Starking Hardy Giant' | 14.78        | 0           | 0          | 619.89        | 2.32        | 0           | 0           | 97.34        |
| 'Success'              | 2.53         | 0           | 0          | 633.12        | 0.4         | 0           | 0           | 99.42        |

\*Bolded rows are the reference genomes and are accompanied by three or four related genotypes.

\*\*The proportion of ancestry is specified for three outgroups (*C. aquatica* (Aqu., A), *C. cordiformis* (Cor., C), *C. myristiciformis* (Myr. M) and *C. illinoensis* (Pecan, P). The first four columns are total introgressed sequence (megabases) and the next four columns are percent of total sequence of each ancestry type.

**Supplementary Table 4. Library metadata for scab susceptibility RNA-sequencing experiments.**

| Lib* | Condition | n.raw**  | n.map    | n.assign | n.ambig | n.multi | SRA Bioproject | SRA BioID   |
|------|-----------|----------|----------|----------|---------|---------|----------------|-------------|
| IXBR | Control   | 67716244 | 20827832 | 1785944  | 334980  | 573552  | PRJNA680537    | SRR13423202 |
| IXBU | Control   | 21476723 | 6103173  | 528358   | 98713   | 162173  | PRJNA680537    | SRR13423203 |
| IXBY | Control   | 54465250 | 18003882 | 1316066  | 307758  | 458928  | PRJNA680537    | SRR13423204 |
| IXCK | Treatment | 30083720 | 10105331 | 963322   | 167236  | 269528  | PRJNA680537    | SRR13423205 |
| IXCN | Treatment | 80778148 | 37052085 | 3544531  | 590398  | 988252  | PRJNA680537    | SRR13423207 |
| IXCR | Treatment | 76031911 | 33070812 | 2657013  | 518121  | 840419  | PRJNA680537    | SRR13423206 |

\*The first three metadata columns give the unique library ID, genotype (genome) ID and the tissue type/replicate for each library.

\*\*The following seven counts columns provide the number of raw and prepped reads, and counts gene-, no gene-, ambiguous-, un- and multi-mapping reads.

**Supplementary Table 5. Gene ontology enrichment terms in the scab resistance experiment\*.**

| Cat. | GO:ID      | Term**                                        | n. annotated | n. significant | n. expected | P-value   | BH-adj. P-value | regulation |
|------|------------|-----------------------------------------------|--------------|----------------|-------------|-----------|-----------------|------------|
| BP   | GO:0009611 | Response to wounding                          | 249          | 12             | 2.4         | 0.0000057 | 0.0139764       | down       |
| BP   | GO:0010185 | Regulation of cellular defense response       | 10           | 3              | 0.1         | 0.0001    | 0.1226          | down       |
| BP   | GO:0009733 | Response to auxin                             | 456          | 14             | 4.4         | 0.00015   | 0.1226          | down       |
| BP   | GO:0009773 | Photosynthetic electron transport photosys. I | 18           | 3              | 0.17        | 0.00065   | 0.31876         | down       |
| BP   | GO:0045490 | Pectin catabolic process                      | 18           | 3              | 0.17        | 0.00065   | 0.31876         | down       |
| BP   | GO:0009409 | Response to cold                              | 435          | 12             | 4.19        | 0.0011    | 0.449533333     | down       |
| BP   | GO:0010143 | Cutin biosynthetic process                    | 23           | 3              | 0.22        | 0.00136   | 0.476388571     | down       |
| BP   | GO:0009753 | Response to jasmonic acid                     | 258          | 9              | 2.49        | 0.00158   | 0.48427         | down       |
| BP   | GO:0015977 | Carbon fixation                               | 19           | 4              | 0.18        | 0.00245   | 0.595167273     | down       |
| BP   | GO:0019725 | Cellular homeostasis                          | 356          | 6              | 3.43        | 0.00248   | 0.595167273     | down       |
| BP   | GO:0055114 | oxidation-reduction process                   | 1937         | 36             | 18.68       | 0.00267   | 0.595167273     | down       |
| BP   | GO:2000022 | Reg. of jasmonic acid mediated signaling      | 30           | 3              | 0.29        | 0.00296   | 0.604826667     | down       |
| BP   | GO:1901568 | Fatty acid derivative metabolic process       | 49           | 3              | 0.47        | 0.00393   | 0.647328        | down       |
| BP   | GO:0071398 | Cellular response to fatty acid               | 10           | 2              | 0.1         | 0.00396   | 0.647328        | down       |
| BP   | GO:0071277 | Cellular response to calcium ion              | 10           | 2              | 0.1         | 0.00396   | 0.647328        | down       |
| BP   | GO:0042135 | Neurotransmitter catabolic process            | 11           | 2              | 0.11        | 0.0048    | 0.653866667     | down       |
| BP   | GO:0009835 | Fruit ripening                                | 11           | 2              | 0.11        | 0.0048    | 0.653866667     | down       |
| BP   | GO:0019253 | Reductive pentose-phosphate cycle             | 11           | 2              | 0.11        | 0.0048    | 0.653866667     | down       |
| BP   | GO:0006636 | unsaturatedfattyacidbiosyntheticprocess       | 14           | 2              | 0.13        | 0.0078    | 0.911910476     | down       |
| BP   | GO:0043693 | Monoterpene biosynthetic process              | 14           | 2              | 0.13        | 0.0078    | 0.911910476     | down       |
| BP   | GO:0010200 | Response to chitin                            | 127          | 5              | 1.22        | 0.00781   | 0.911910476     | down       |
| BP   | GO:0042737 | Drug catabolic process                        | 154          | 8              | 1.48        | 0.00882   | 0.953081739     | down       |
| BP   | GO:0009071 | Serine family amino acid catabolic process    | 15           | 2              | 0.14        | 0.00894   | 0.953081739     | down       |
| BP   | GO:0009695 | Jasmonic acid biosynthetic process            | 46           | 3              | 0.44        | 0.00989   | 1               | down       |
| MF   | GO:0020037 | Heme binding                                  | 494          | 15             | 4.76        | 0.000097  | 0.077018        | down       |
| MF   | GO:0016717 | Oxidoreductase activity                       | 19           | 3              | 0.18        | 0.00076   | 0.30172         | down       |
| MF   | GO:0005506 | Iron ion binding                              | 462          | 12             | 4.45        | 0.00184   | 0.4764          | down       |
| MF   | GO:0016168 | Chlorophyll binding                           | 31           | 3              | 0.3         | 0.00325   | 0.4764          | down       |
| MF   | GO:0016762 | xyloglucan:xyloglucosyl transferase activity  | 35           | 3              | 0.34        | 0.0046    | 0.4764          | down       |
| MF   | GO:0034007 | S-linaloolsynthase activity                   | 11           | 2              | 0.11        | 0.0048    | 0.4764          | down       |
| MF   | GO:0005504 | Fatty acid binding                            | 11           | 2              | 0.11        | 0.0048    | 0.4764          | down       |
| MF   | GO:0019825 | Oxygen binding                                | 11           | 2              | 0.11        | 0.0048    | 0.4764          | down       |
| MF   | GO:0004497 | Monoxygenase activity                         | 371          | 10             | 3.57        | 0.00543   | 0.479046667     | down       |
| MF   | GO:0009815 | 1-aminocyclopropane-1-carboxylateoxidase      | 13           | 2              | 0.13        | 0.00672   | 0.485061818     | down       |
| MF   | GO:0051185 | Coenzyme transmembrane transporter activity   | 13           | 2              | 0.13        | 0.00672   | 0.485061818     | down       |
| MF   | GO:0051213 | Dioxygenase activity                          | 136          | 5              | 1.31        | 0.00954   | 0.575082857     | down       |
| MF   | GO:0045330 | Aspartylesterase activity                     | 46           | 3              | 0.44        | 0.00987   | 0.575082857     | down       |
| CC   | GO:0098807 | Chloroplast thylakoid membrane protein comp.  | 14           | 5              | 0.14        | 0.0000002 | 0.0000814       | down       |
| CC   | GO:0009522 | Photosystem I                                 | 42           | 5              | 0.43        | 0.000067  | 0.0136345       | down       |
| CC   | GO:0009535 | Chloroplast thylakoid membrane                | 365          | 16             | 3.74        | 0.00083   | 0.08954         | down       |
| CC   | GO:0010319 | stromule                                      | 42           | 4              | 0.43        | 0.00088   | 0.08954         | down       |
| CC   | GO:0048046 | apoplast                                      | 239          | 8              | 2.45        | 0.00331   | 0.269434        | down       |
| CC   | GO:0010287 | plastoglobule                                 | 69           | 4              | 0.71        | 0.00551   | 0.3327225       | down       |
| CC   | GO:0005576 | Extracellular region                          | 1024         | 23             | 10.5        | 0.00605   | 0.3327225       | down       |
| CC   | GO:0031410 | Cytoplasmic vesicle                           | 2977         | 43             | 30.52       | 0.00654   | 0.3327225       | down       |
| CC   | GO:0005618 | Cell wall                                     | 394          | 10             | 4.04        | 0.00797   | 0.360421111     | down       |
| BP   | GO:0010200 | Response to chitin                            | 127          | 12             | 0.62        | 1.3E-12   | 3.1876E-09      | up         |
| BP   | GO:0071456 | Cellular response to hypoxia                  | 249          | 7              | 1.22        | 0.00022   | 0.26972         | up         |
| BP   | GO:0006468 | Protein phosphorylation                       | 1781         | 20             | 8.71        | 0.00035   | 0.286066667     | up         |
| BP   | GO:0008152 | Metabolic process                             | 12751        | 74             | 62.38       | 0.00279   | 1               | up         |
| BP   | GO:0000288 | nuclear-transcribed mRNA catabolic process    | 17           | 2              | 0.08        | 0.00307   | 1               | up         |
| BP   | GO:0002213 | Defense response to insect                    | 31           | 3              | 0.15        | 0.0046    | 1               | up         |
| BP   | GO:0009409 | Response to cold                              | 435          | 7              | 2.13        | 0.00554   | 1               | up         |
| BP   | GO:0009751 | Response to salicylic acid                    | 243          | 5              | 1.19        | 0.00688   | 1               | up         |
| BP   | GO:0071248 | Cellular response to metal ion                | 27           | 2              | 0.13        | 0.00768   | 1               | up         |
| MF   | GO:0004713 | Protein tyrosine kinase activity              | 1570         | 20             | 8.13        | 0.00016   | 0.09925         | up         |
| MF   | GO:0003700 | DNA-binding transcription factor activity     | 1625         | 20             | 8.41        | 0.00025   | 0.09925         | up         |
| MF   | GO:0030247 | Polysaccharide binding                        | 150          | 5              | 0.78        | 0.00111   | 0.29378         | up         |
| MF   | GO:0016760 | cellulosesynthase(UDP-forming) activity       | 44           | 3              | 0.23        | 0.00154   | 0.30569         | up         |
| MF   | GO:0043565 | sequence-specific DNA binding                 | 721          | 9              | 3.73        | 0.00811   | 0.951917778     | up         |
| MF   | GO:0030145 | Manganese ion binding                         | 82           | 3              | 0.42        | 0.00891   | 0.951917778     | up         |
| MF   | GO:0004674 | Protein serine/threonine kinase activity      | 681          | 9              | 3.53        | 0.00901   | 0.951917778     | up         |
| CC   | GO:0031410 | Cytoplasmic vesicle                           | 2977         | 22             | 11.98       | 0.0025    | 1               | up         |
| CC   | GO:0009505 | plant-type cell wall                          | 171          | 4              | 0.69        | 0.005     | 1               | up         |

\*Only significant terms with raw two-sided Fisher's test P-values < 0.01 are presented.

\*\*The first three columns give metadata for each GO term (category, ID, description) and columns 4-8 present the statistics for the enrichment test (n. genes annotated in each category, number in the tested group, number expected, Fisher's P-value and FDR-adjusted P-value). The last column gives the regulation (up/down) type and the list of all genes in the test group. This experiment was conducted once at a single time point.



**Supplementary Table 6. Candidate gene data for the main QTL peak for *P. russellae* resistance\*.**

| gene ID**       | pangenomePos | primChr | primStart | primEnd | altChr        | altStart | altEnd | percPepld  | diseaseAnnot                      |
|-----------------|--------------|---------|-----------|---------|---------------|----------|--------|------------|-----------------------------------|
| CiLak.16G012100 | 40918        |         |           | 1521681 | scaffold_855  | 47793    | 50713  | 58.6206897 | Not clearly disease associated    |
| CiEIL.16G013600 | 40920        |         |           |         | scaffold_855  | 59574    | 61157  |            | Not clearly disease associated    |
| CiLak.16G013300 | 40931        | Chr16   | 1642581   | 1645058 | scaffold_33   | 19940    | 21770  | 7.93650794 | Not clearly disease associated    |
| CiPaw.16G014500 | 40933        |         |           |         | scaffold_33   | 15229    | 15340  |            | Not clearly disease associated    |
| CiPaw.16G015100 | 40937        |         |           |         | scaffold_33   | 95224    | 204094 |            | Disease associated with LRR-motif |
| CiPaw.16G015000 | 40938        |         |           |         | scaffold_33   | 54171    | 54600  |            | Not clearly disease associated    |
| CiPaw.16G015600 | 40939        |         |           |         | scaffold_33   | 421216   | 421740 |            | Disease associated with LRR-motif |
| CiPaw.16G015500 | 40941        |         |           |         | scaffold_33   | 324446   | 327005 |            | Disease associated                |
| Caril.16G014100 | 40944        |         |           |         | scaffold_33   | 285108   | 286117 |            | Not clearly disease associated    |
| Caril.16G014200 | 40947        |         |           |         | scaffold_33   | 558779   | 559102 |            | Disease associated                |
| CiEIL.16G015100 | 40948        |         |           |         | scaffold_33   | 70139    | 494316 |            | Disease associated with LRR-motif |
| CiEIL.16G015200 | 40949        |         |           |         | scaffold_33   | 298347   | 327816 |            | Disease associated with LRR-motif |
| CiPaw.16G015700 | 40951        |         |           |         | scaffold_33   | 422605   | 422945 |            | Not clearly disease associated    |
| CiPaw.16G015800 | 40953        |         |           |         | scaffold_33   | 424493   | 424680 |            | Disease associated                |
| CiLak.16G013900 | 40954        | Chr16   | 1781863   | 1790118 | scaffold_33   | 377203   | 379702 | 68.1701031 | Disease associated with LRR-motif |
| CiLak.16G013800 | 40955        | Chr16   | 1752618   | 1758703 | scaffold_33   | 176923   | 177078 | 96.0784314 | Disease associated                |
| CiLak.16G014000 | 40956        | Chr16   | 1790136   | 1795683 | scaffold_33   | 342578   | 383674 | 94.4347826 | Disease associated with LRR-motif |
| CiEIL.16G015800 | 40957        |         |           |         | scaffold_33   | 325929   | 326568 |            | Disease associated with LRR-motif |
| CiEIL.16G015900 | 40958        |         |           |         | scaffold_33   | 409248   | 409463 |            | Not clearly disease associated    |
| CiEIL.16G016000 | 40959        |         |           |         | scaffold_33   | 410871   | 411305 |            | Disease associated with LRR-motif |
| CiPaw.16G016000 | 40960        |         |           |         | scaffold_33   | 438901   | 439433 |            | Disease associated                |
| CiLak.16G014100 | 40961        | Chr16   | 1798540   | 1804542 | scaffold_33   | 424823   | 430716 | 45.3125    | Disease associated with LRR-motif |
| CiEIL.16G016300 | 40962        |         |           |         | scaffold_33   | 425645   | 428106 |            | Disease associated with LRR-motif |
| CiLak.16G014200 | 40963        | Chr16   | 1804973   | 1807424 | scaffold_33   | 432294   | 432995 | 94.6308725 | Not clearly disease associated    |
| CiEIL.16G016900 | 40964        |         |           |         | scaffold_33   | 339692   | 340036 |            | Disease associated                |
| CiEIL.16G017200 | 40966        |         |           |         | scaffold_33   | 372165   | 372644 |            | Not clearly disease associated    |
| CiLak.16G014400 | 40967        | Chr16   | 1821334   | 1823940 | scaffold_33   | 597948   | 598427 | 93.7106918 | Not clearly disease associated    |
| Caril.16G015600 | 40969        |         |           |         | scaffold_33   | 622971   | 625912 |            | Disease associated with LRR-motif |
| CiPaw.16G016400 | 40970        |         |           |         | scaffold_33   | 615353   | 616148 |            | Not clearly disease associated    |
| CiLak.16G014900 | 40973        | Chr16   | 1849478   | 1853295 | scaffold_33   | 663368   | 666773 | 93.6007641 | Disease associated with LRR-motif |
| CiLak.16G018000 | 41009        | Chr16   | 2208285   | 2211830 | scaffold_4225 | 40996    | 44565  | 71.4285714 | Disease associated                |
| Caril.16G019100 | 41012        |         |           |         | scaffold_4225 | 26371    | 27058  |            | Not clearly disease associated    |
| CiPaw.16G020100 | 41022        |         |           |         | scaffold_4989 | 25351    | 31496  |            | Not clearly disease associated    |
| CiLak.16G019000 | 41025        | Chr16   | 2387765   | 2392040 | scaffold_4989 | 16128    | 31466  | 22.4489796 | Not clearly disease associated    |

\*We defined 34 total candidate genes in the region, 22 of which were only found on the alternative scaffolds and 12 where found as 1-to-1 orthologs between the two sequences but had significant peptide divergence (< 98% similarity).

\*\*The gene ID and pangenome position are presented in the first two columns, while primary and alternative scaffold coordinates of all candidate genes are presented in columns 3-8. For 1-to-1 orthologs, the percent peptide identity is presented in column 9. The rightmost column contains a manual curation of genes in the interval, specifying whether annotations of homologs in other species are disease associated or similar to an annotated Leucine Rich Repeat (LRR) gene.

**Supplementary Table 7. DNA resequencing library metadata for genotypes used in introgression analysis.**

| Lib* | PlantID            | species          | grp**          | N bases*** | Cov (X) | aligned_reads | mapped_bases | Map(%) | SRA Run     | SRA Accession |
|------|--------------------|------------------|----------------|------------|---------|---------------|--------------|--------|-------------|---------------|
| IXDC | 02_AQU_LA_BLI      | C. aquatica      | Caquatica      | 3.6899E+10 | 57      | 206174400     | 548003584    | 81     | SRR14065918 | PRJNA689620   |
| IXID | 92_AQU_TX_2        | C. aquatica      | Caquatica      | 4.3604E+10 | 67      | 231438952     | 550933979    | 78     | SRR13361463 | PRJNA689620   |
| IXDB | 02_AQU_LA_BFI      | C. aquatica      | Caquatica      | 4.3709E+10 | 67      | 241548178     | 553310225    | 81     | SRR13361464 | PRJNA689620   |
| IXSD | 02_COR_LA_BFI      | C. cordiformis   | Ccordiformis   | 4.2121E+10 | 65      | 197685840     | 467071899    | 68     | SRR13370650 | PRJNA689620   |
| IXIH | 02_COR_LA_BFI      | C. cordiformis   | Ccordiformis   | 4.0412E+10 | 62      | 199956970     | 469240866    | 72     | SRR13370651 | PRJNA689620   |
| IYAS | Randall            | Pecan            | elliott        | 2.6741E+10 | 41      | 154220910     | 592868768    | 83     | SRR13521713 | PRJNA680537   |
| IYBA | StarkingHardyGiant | Pecan            | pawnee         | 2.788E+10  | 43      | 163896290     | 593691228    | 85     | SRR13521714 | PRJNA680537   |
| IXZY | Kennedy            | Pecan            | elliott        | 2.8957E+10 | 45      | 166675262     | 592622420    | 83     | SRR13521711 | PRJNA680537   |
| IXKW | Moore              | Pecan            | elliott        | 2.9855E+10 | 46      | 170643868     | 593143136    | 83     | SRR13521706 | PRJNA680537   |
| IWSA | Comanche           | Pecan            | truePecan      | 3.0529E+10 | 47      | 176535428     | 597360462    | 85     | SRR13521699 | PRJNA680537   |
| IXDS | 87_MX_5_1.7        | Pecan            | oaxaca         | 3.1067E+10 | 48      | 185397478     | 604552507    | 87     | SRR13521705 | PRJNA680537   |
| IXZK | GrazZona           | Pecan            | truePecan      | 3.2323E+10 | 50      | 188658162     | 598429575    | 84     | SRR13521710 | PRJNA680537   |
| IXDR | 87_MX_4_5.5        | Pecan            | oaxaca         | 3.2341E+10 | 50      | 192893952     | 606105269    | 87     | SRR13521704 | PRJNA680537   |
| IXWU | Spence             | Pecan            | truePecan      | 3.3876E+10 | 52      | 193466494     | 595864842    | 83     | SRR13521708 | PRJNA680537   |
| IYAC | Limpia_Creek       | Pecan            | truePecan      | 3.3719E+10 | 52      | 198018044     | 601661665    | 85     | SRR13521712 | PRJNA680537   |
| IWWM | Mohawk             | Pecan            | pawnee         | 3.3829E+10 | 59      | 213254820     | 596840521    | 82     | SRR13521700 | PRJNA680537   |
| IXDM | 87_MX_3_2.4        | Pecan            | oaxaca         | 3.4743E+10 | 53      | 213939294     | 627922405    | 90     | SRR13521703 | PRJNA680537   |
| IXYW | Curris             | Pecan            | elliott        | 3.6505E+10 | 56      | 214153468     | 599653948    | 85     | SRR13521709 | PRJNA680537   |
| IXTE | Burkett            | Pecan            | truePecan      | 3.9254E+10 | 60      | 225722918     | 604099642    | 83     | SRR13521707 | PRJNA680537   |
| IYBB | Success            | Pecan            | pawnee         | 4.4789E+10 | 69      | 260797734     | 597468482    | 84     | SRR13521716 | PRJNA680537   |
| IWWS | Kanza              | Pecan            | lakota         | 2.4812E+10 | 38      | 146145368     | 592142158    | 86     | SRR13521702 | PRJNA680537   |
| IWWP | Osage              | Pecan            | lakota         | 2.5831E+10 | 40      | 149852624     | 595924743    | 85     | SRR13521701 | PRJNA680537   |
| IYBQ | Major              | Pecan            | lakota         | 4.2539E+10 | 65      | 246994736     | 577223146    | 84     | SRR13521715 | PRJNA680537   |
| IXLQ | 07_MYR_LA_1        | C. myrsiciformis | Cmyrsiciformis | 2.8305E+10 | 44      | 143826334     | 448754565    | 74     | SRR13370926 | PRJNA689620   |
| IXLR | 08_MYR_AL_1.5      | C. myrsiciformis | Cmyrsiciformis | 3.063E+10  | 47      | 15462122      | 452820690    | 74     | SRR13370927 | PRJNA689620   |
| IYBZ | 92_MYR_TX_1G       | C. myrsiciformis | Cmyrsiciformis | 3.7031E+10 | 57      | 186828348     | 463177141    | 73     | SRR13370928 | PRJNA689620   |
| IHMT | 87MX3              | Pecan            | oaxaca         | 1.39E+11   | 214     | 731167006     | 641833840    | 79     | SRR13403833 | PRJNA680537   |
| IKFU | LAKOTA             | Pecan            | lakota         | 6.0885E+10 | 94      | 311693958     | 605255273    | 77     | SRR13403762 | PRJNA680537   |
| IPZM | ELLIOTT            | Pecan            | elliott        | 1.25E+11   | 193     | 640294398     | 612044251    | 76     | SRR13403763 | PRJNA680537   |
| JAED | PAWNEE             | Pecan            | pawnee         | 9.1529E+10 | 141     | 450284968     | 610613427    | 71     | SRR13404306 | PRJNA680537   |

\*The first three columns give the unique library IDs, breeding pedigree/cultivar/genotype IDs and species IDs.

\*\*The fifth column gives the experimental classification for the hidden Markov model (HMM), where the training libraries are given as their species IDs (or 'true pecan' for C. *illinoensis* training libraries), and test libraries are specified by their focal reference genotype.

\*\*\*The following five columns give the total number of sequenced bases, genomic coverage, total number of aligned reads, number of reads constrained to coverage between 8x-500x and the percentage of reads mapping. The rightmost two columns give the SRA run and accession identifiers for the libraries deposited on NCBI.
